# Supplementary material for: Hydrophobically Functionalized Poly(Acrylic Acid) Comprising the Ester-Type Labile Spacer: Synthesis and Self-Organization in Water
Source: MDPI journal article supplement (doi:10.3390/polym12051185), 2020-05-22
Supplement: s1 [file s1]

## **ELECTRONIC SUPPLEMENTARY MATERIAL**

### **Hydrophobically functionalized poly(acrylic acid) comprising the ester-type labile spacer: Synthesis and self-organization in water**

**Łukasz Lamch<sup>\*a</sup>, Sylwia Ronka<sup>b</sup>, Izabela Moszyńska<sup>a</sup>, Piotr Warszyński<sup>c</sup>, Kazimiera A. Wilk<sup>\*a</sup>**

<sup>a)</sup> Department of Engineering and Technology of Chemical Processes, Faculty of Chemistry, Wrocław University of Science and Technology, Wybrzeże Wyspiańskiego 27, 50-370 Wrocław, Poland

<sup>b)</sup> Department of Engineering and Technology of Polymers, Faculty of Chemistry, Wrocław University of Science and Technology, Wybrzeże Wyspiańskiego 27, 50-370 Wrocław, Poland

<sup>c)</sup> Jerzy Haber Institute of Catalysis and Surface Chemistry, Polish Academy of Sciences, Niezapominajek 8, 30-239 Kraków, Poland

\* To whom correspondence should be addressed

phone: +48 71 3202828, fax: +48 71 3203678

email: [lukasz.lamch@pwr.edu.pl](mailto:lukasz.lamch@pwr.edu.pl) (Łukasz Lamch), [kazimiera.wilk@pwr.edu.pl](mailto:kazimiera.wilk@pwr.edu.pl) (Kazimiera A. Wilk)

1. FT-IR, etc and  $^1\text{H}$  NMR spectra

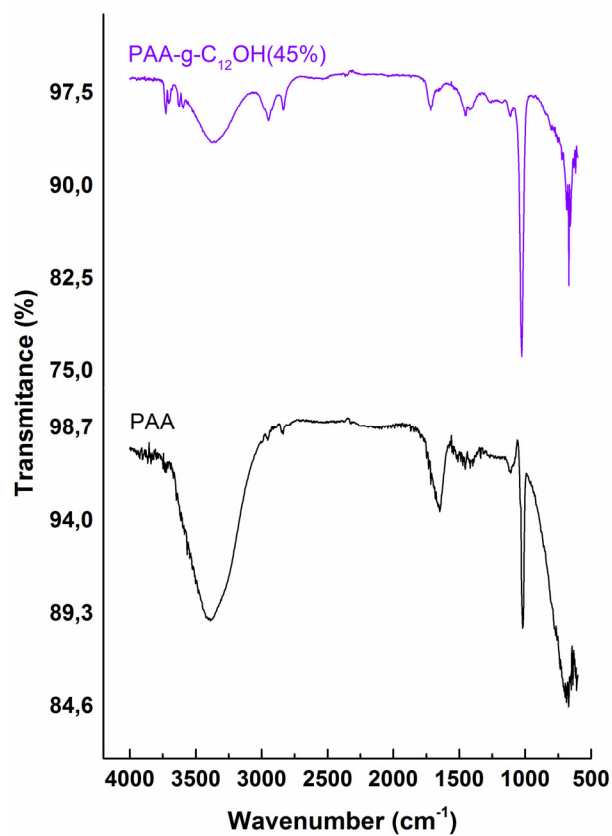

Figure 1S. FT-IR spectrum of the synthesized hydrophobically functionalized poly(acrylic acid) in comparison to poly(acrylic acid).

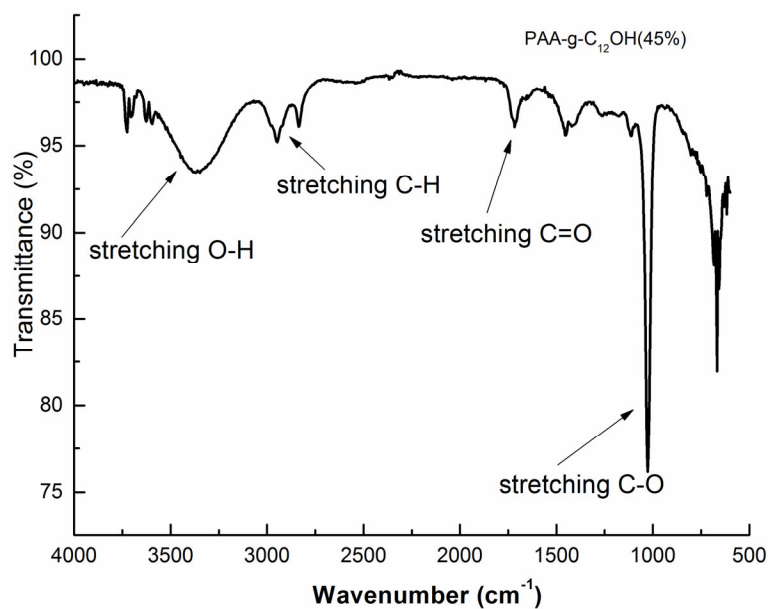

Figure 2S. FT-IR spectrum of the synthesized hydrophobically functionalized poly(acrylic acid) with marked signals attributed to the main bonds.

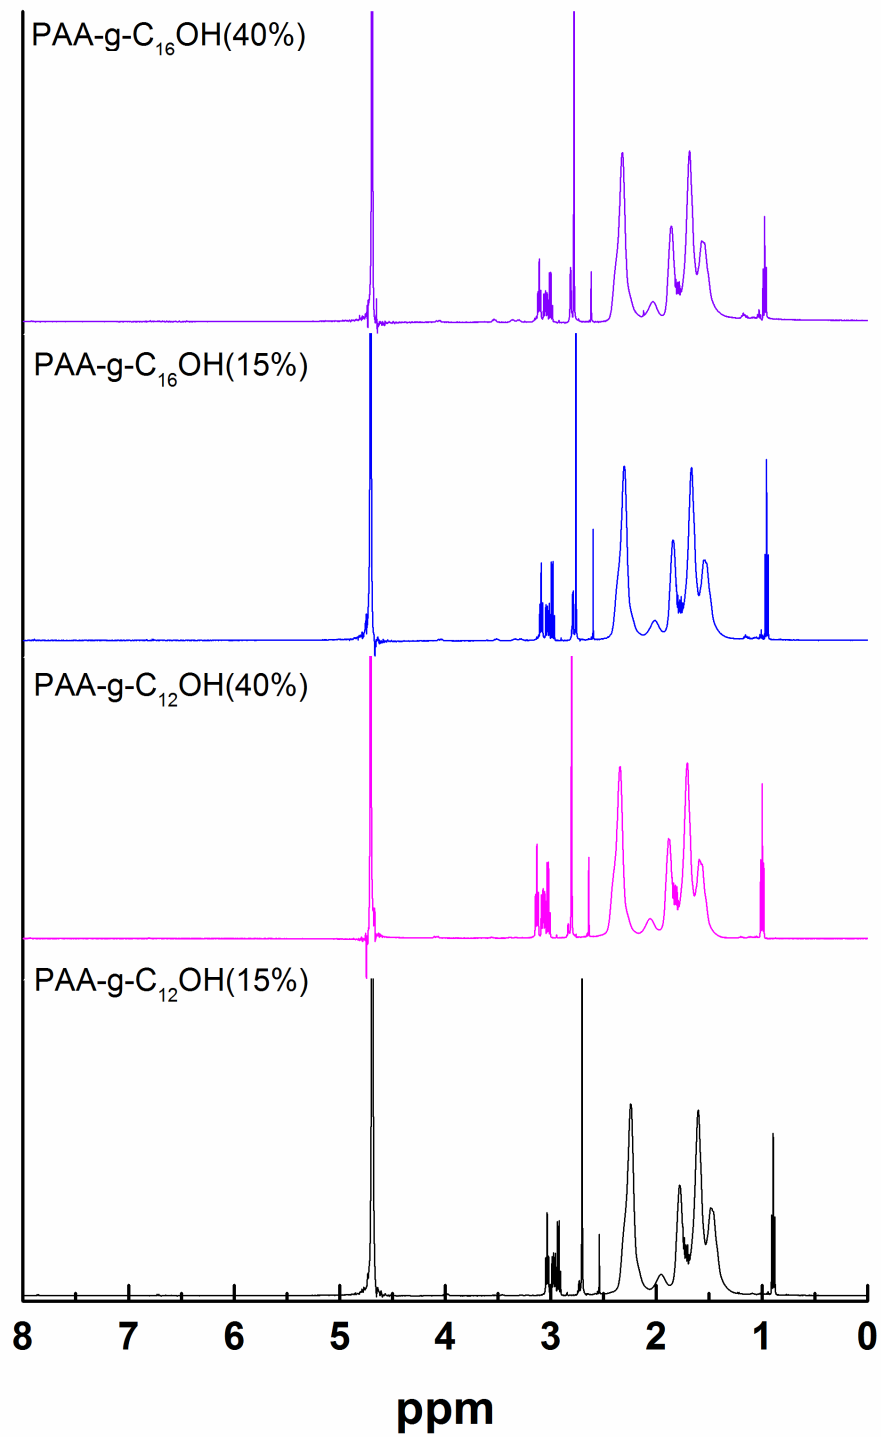

Figure 3S.  $^1\text{H}$  NMR spectra of the synthesized hydrophobically functionalized poly(acrylic acid) (0 – 8 ppm range)

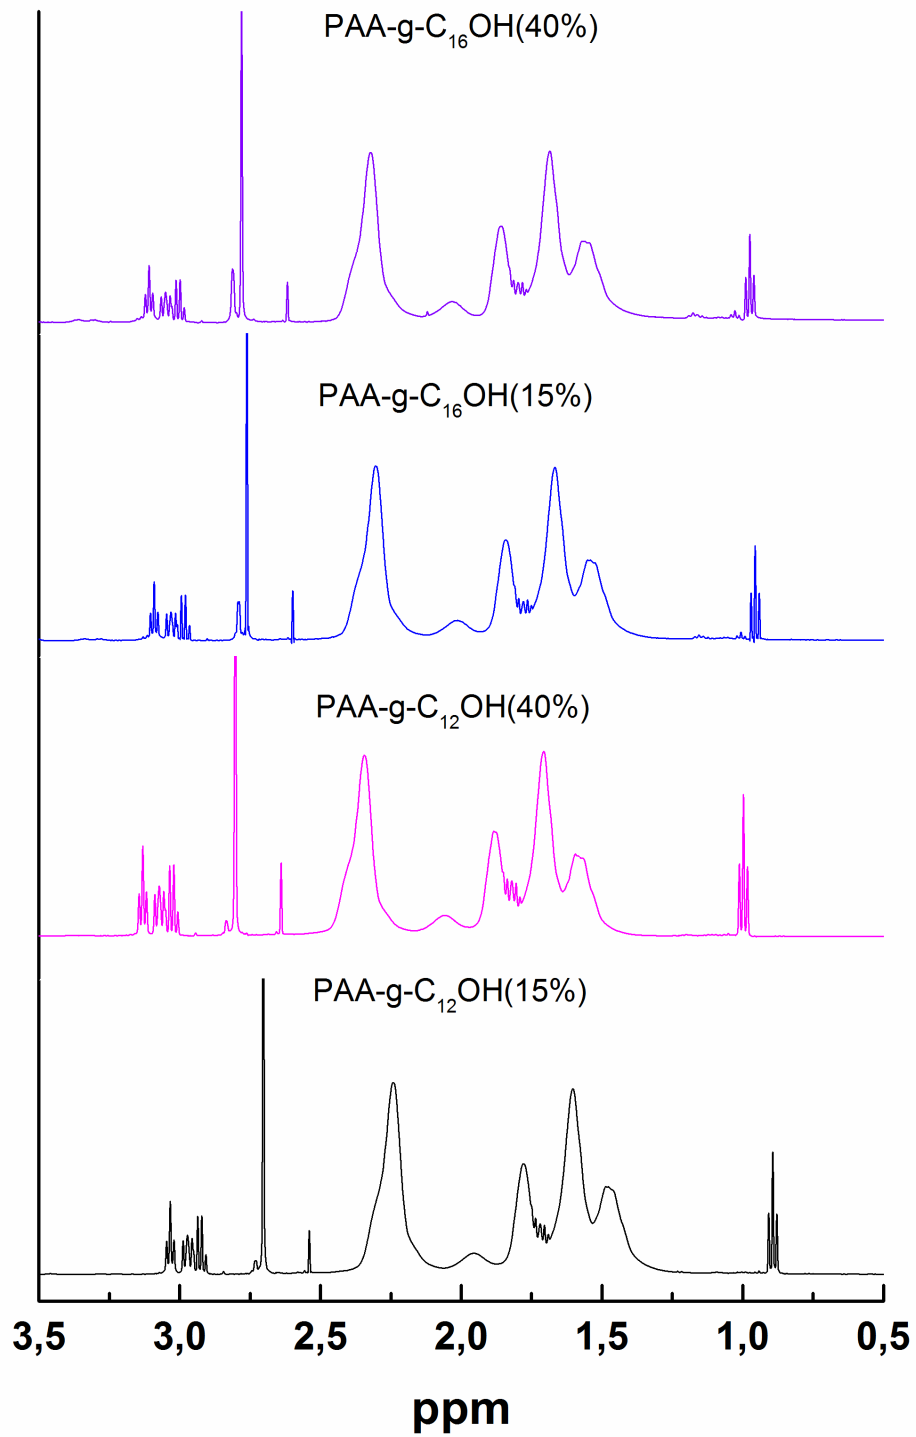

Figure 4S.  $^1\text{H}$  NMR spectra of the synthesized hydrophobically functionalized poly(acrylic acid) (0.5 – 3.5 ppm range).

## 2. Determination of diffusion coefficients by fitting to triexponential functions

Table 1S. Determination of diffusion coefficients (D) and hydrodynamic diameters ( $D_H$ ) by fitting data to appropriate triexponential models:  $G^1$  (intensity versus linear gradient) or  $G^2$  (intensity versus square gradient).

| c [mg/mL] | Model ( $G^1$ or $G^2$ ) | PAA-g- $C_{12}OH(15\%)$  |                       |         | PAA-g- $C_{16}OH(40\%)$ |            |         |
|-----------|--------------------------|--------------------------|-----------------------|---------|-------------------------|------------|---------|
|           |                          | D [ $m^2/s$ ]            | $D_H$ [nm]            | $R^2$   | D [ $m^2/s$ ]           | $D_H$ [nm] | $R^2$   |
| 10        | $G^1$ (3 coefficients)   | 5.502*10 <sup>-10</sup>  | 0.7                   | 0.99967 | 5.368*10 <sup>-10</sup> | 0.7        | 0.99986 |
|           |                          | 5.502*10 <sup>-10</sup>  | 0.7                   |         | 5.368*10 <sup>-10</sup> | 0.7        |         |
|           |                          | 5.502*10 <sup>-10</sup>  | 0.7                   |         | 5.368*10 <sup>-10</sup> | 0.7        |         |
|           | $G^2$ (3 coefficients)   | 5.498*10 <sup>-10</sup>  | 0.7                   | 0.99967 | 5.356*10 <sup>-10</sup> | 0.7        | 0.99986 |
|           |                          | 5.498*10 <sup>-10</sup>  | 0.7                   |         | 5.356*10 <sup>-10</sup> | 0.7        |         |
|           |                          | 5.498*10 <sup>-10</sup>  | 0.7                   |         | 5.356*10 <sup>-10</sup> | 0.7        |         |
| 45        | $G^1$ (3 coefficients)   | 4.228*10 <sup>-10</sup>  | 1.0                   | 0.99996 | 3.814*10 <sup>-10</sup> | 1.0        | 0.99983 |
|           |                          | 4.228*10 <sup>-10</sup>  | 1.0                   |         | 3.814*10 <sup>-10</sup> | 1.0        |         |
|           |                          | 6.953*10 <sup>-11</sup>  | 5.8                   |         | 7.810*10 <sup>-11</sup> | 5.1        |         |
|           | $G^2$ (3 coefficients)   | 4.230*10 <sup>-10</sup>  | 1.0                   | 0.99996 | 3.813*10 <sup>-10</sup> | 1.0        | 0.99983 |
|           |                          | 4.229*10 <sup>-10</sup>  | 1.0                   |         | 3.813*10 <sup>-10</sup> | 1.0        |         |
|           |                          | 1.248*10 <sup>-11</sup>  | 32.1                  |         | 7.810*10 <sup>-11</sup> | 5.1        |         |
| 100       | $G^1$ (3 coefficients)   | 4.041*10 <sup>-10</sup>  | 1.0                   | 0.99988 | 3.229*10 <sup>-10</sup> | 1.2        | 0.99992 |
|           |                          | 2.007*10 <sup>-9</sup>   | 0.2                   |         | 3.229*10 <sup>-10</sup> | 1.2        |         |
|           |                          | 3.332*10 <sup>-122</sup> | 1.2*10 <sup>112</sup> |         | 3.229*10 <sup>-10</sup> | 1.2        |         |
|           | $G^2$ (3 coefficients)   | 3.492*10 <sup>-10</sup>  | 1.1                   | 0.99988 | 3.236*10 <sup>-10</sup> | 1.2        | 0.99992 |
|           |                          | 1.367*10 <sup>-9</sup>   | 0.3                   |         | 3.236*10 <sup>-10</sup> | 1.2        |         |
|           |                          | -4.327*10 <sup>-10</sup> | -0.9                  |         | 3.236*10 <sup>-10</sup> | 1.2        |         |

### 3. *Molecular modeling studies*

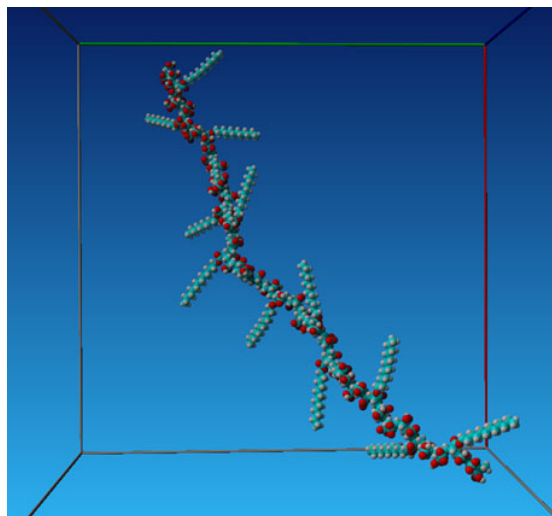

Figure 5S. Initial conformation of hydrophobically modified PAA molecule used for the molecular dynamics simulations.

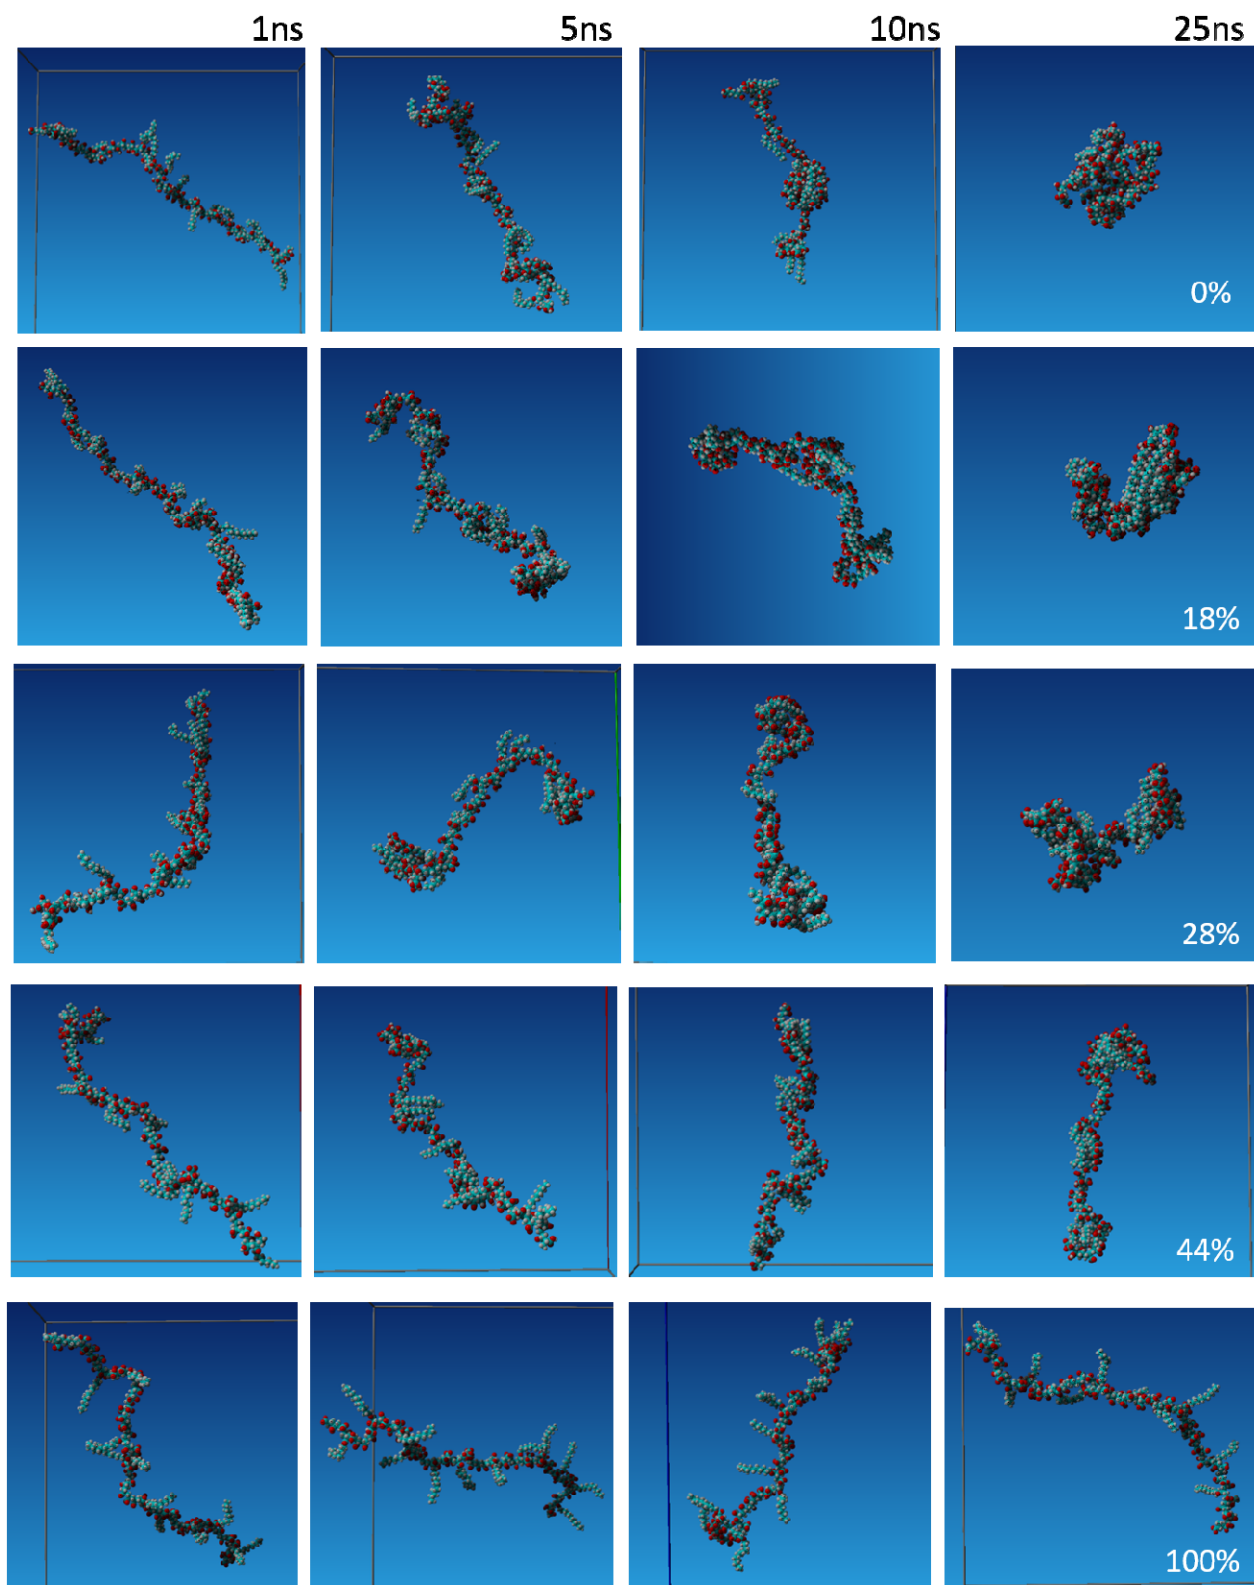

Figure 6S. Snapshots from the molecular dynamics simulations of PAA-g-C<sub>12</sub>OH(15%) with various degree of charging (marked in the Figure) taken after 1ns, 5 ns, 10 ns and 25 ns of the simulation run.
